# Supplementary material for: BPOP-v1 model: exploring the impact of changes in the biological pump on the shelf sea and ocean nutrient and redox state
Source: Copernicus journal article supplement (doi:10.5194/gmd-13-1865-2020), 2020-04-09
Supplement: Supplementary file 1 [file gmd-13-1865-2020-supplement.zip]

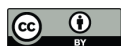

## *Supplement of*

# **BPOP-v1 model: exploring the impact of changes in the biological pump on the shelf sea and ocean nutrient and redox state**

**Elisa Lovecchio and Timothy M. Lenton**

*Correspondence to:* Elisa Lovecchio (e.lovecchio@exeter.ac.uk)

- [gmd-13-1865-2020-supplement-title-page.pdf](#)
- BPOP\_ver1
  - .DS\_Store
  - Users\_manual.pdf
  - eqn\_BPOP\_LOOPzrem.m
  - param\_BPOP\_LOOPzrem.m
  - plot\_BPOP\_LOOPzrem.m
  - run\_BPOP\_LOOPzrem.m

The copyright of individual parts of the supplement might differ from the CC BY 4.0 License.
