# Supplementary material for: BPOP-v1 model: exploring the impact of changes in the biological pump on the shelf sea and ocean nutrient and redox state
Source: Copernicus journal article supplement (doi:10.5194/gmd-13-1865-2020), 2020-04-09
Supplement: Supplementary file 2 [file gmd-13-1865-2020-supplement.zip]

Supplement to:

## **BPOP-v1 model: exploring the impact of changes in the biological pump on the shelf sea and ocean nutrient and redox state**

Elisa Lovecchio<sup>1</sup> and Timothy M. Lenton<sup>1</sup>

<sup>1</sup>Global Systems Institute, University of Exeter, Exeter, EX4 4QE, United Kingdom

Correspondence to: Elisa Lovecchio ([e.lovecchio@exeter.ac.uk](mailto:e.lovecchio@exeter.ac.uk))

---

### **BPOP-v1 model: user's manual**

The BPOP model has been uploaded as a supplement to the overmentioned publication as a zip file and is available for download.

-

BPOP was developed using Matlab R2018b and runs on a single core.

The model consists in 3 Matlab files:

the main file that calls the equations (*run\_BPOP\_LOOPzrem.m*), the file containing the set of equations to integrate (*eqn\_BPOP\_LOOPzrem.m*), and the file containing the list of parameters (*param\_BPOP\_LOOPzrem.m*).

In this version, the main file is set to run the model for varying  $z_{rem}^S$  and  $z_{rem}^L$  by looping in a user defined interval of discrete values. By running the main file, the equations are integrated for each couple of  $z_{rem}^S$  and  $z_{rem}^L$  defined by the chosen interval.

The main file saves the entire set of final values of the state variables and diagnostic fluxes calculated in the 2D space of the chosen values of  $z_{rem}^S$  and  $z_{rem}^L$  in a *.mat* (Matlab data) file.

The file also contains the names and units of the saved variable and fluxes.

-

We provide an additional file (*plot\_BPOP\_LOOPzrem.m*) with an example of how to plot some of the model output in the 2D space of  $z_{rem}^S$  and  $z_{rem}^L$ .

February 2020
