# Supplementary material for: BPOP-v1 model: exploring the impact of changes in the biological pump on the shelf sea and ocean nutrient and redox state
Source: Copernicus journal article supplement (doi:10.5194/gmd-13-1865-2020), 2020-04-09
Supplement: Supplementary file 3 [file gmd-13-1865-2020-supplement.zip]

Archive with 8 entries (7 files):
- BPOP_ver1/
- BPOP_ver1/eqn_BPOP_LOOPzrem.m
- BPOP_ver1/.DS_Store
- BPOP_ver1/plot_BPOP_LOOPzrem.m
- BPOP_ver1/Users_manual.pdf
- BPOP_ver1/param_BPOP_LOOPzrem.m
- BPOP_ver1/run_BPOP_LOOPzrem.m
- gmd-13-1865-2020-supplement-title-page.pdf
